# Supplementary material for: Involvement of ROS in nanosilver-caused suppression of aflatoxin production from Aspergillus flavus
Source: Royal Society of Chemistry journal article supplement (doi:10.1039/c7ra02312j), 2017-01-01
Supplement: c7ra02312j1.pdf [file c7ra02312j1.pdf]

## *Supplementary Information*

### **Involvement of ROS in Nanosilver-caused Suppression of Aflatoxin Production from *Aspergillus flavus***

Jing Zhao<sup>1,2</sup>, Ling Wang<sup>1,2</sup>, Dan Xu<sup>3,4\*</sup> and Zhisong Lu<sup>1,2\*</sup>

<sup>1</sup> Chongqing Key Laboratory for Advanced Materials & Technologies of Clean Energies, Southwest University, No. 1 Tiansheng Road, Chongqing 400715, P. R. China.

<sup>2</sup> Institute for Clean Energy & Advanced Materials, Faculty of Materials and Energy, Southwest University, No. 1 Tiansheng Road, Chongqing 400715, P. R. China.

<sup>3</sup> Department of Gastroenterology, the Central Hospital of Wuhan, Tongji Medical College, Huazhong University of Science and Technology, Shengli Street Jiang'an District No. 26, Wuhan 430014, P. R. China.

<sup>4</sup> Key Laboratory for Molecular Diagnosis of Hubei Province, the Central Hospital of Wuhan, Tongji Medical College, Huazhong University of Science and Technology, Shengli Street Jiang'an District No. 26, Wuhan 430014, P. R. China.

\*: Authors to whom correspondence should be addressed. Tel.: +86-23-68254732; Fax: +86-23-68254969. E-mail: zslu@swu.edu.cn (Z. S. Lu) or Tel: +86-27-82211566; E-mail: drxu0624@gmail.com (D. Xu).

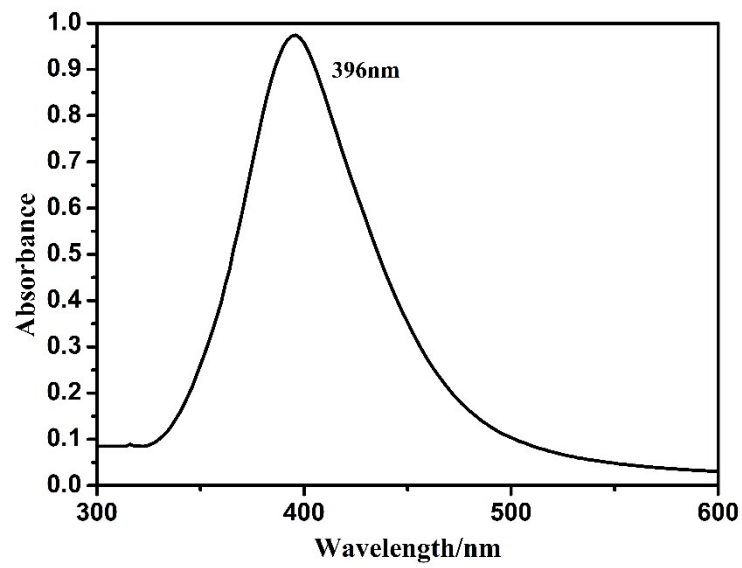

Figure S1. UV-vis spectrum of AgNPs suspension after 4-day storage

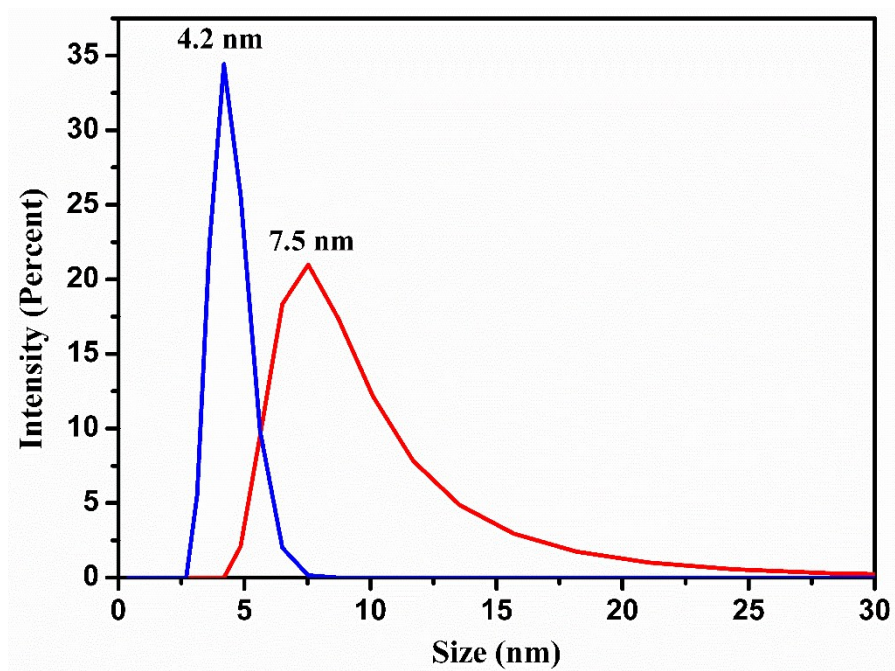

Figure S2. Dynamic size of AgNPs before (blue line)/after (red line) storage in culture medium

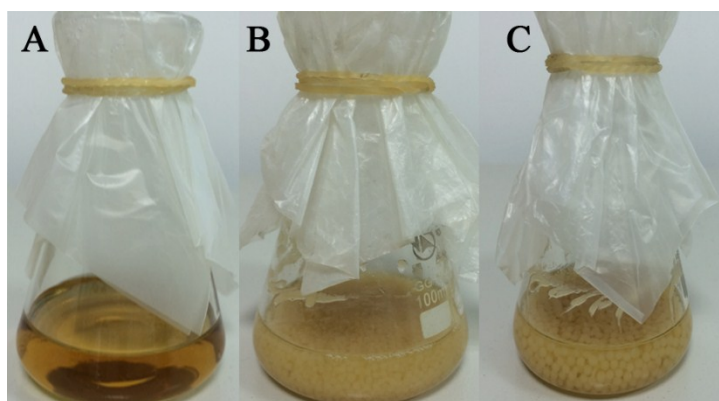

**Figure S3.** (A) Culture medium without fungi; (B) *A. flavus*-inoculated medium after 48 h's incubation; (C) *A. flavus*-inoculated medium after 72 h's incubation.

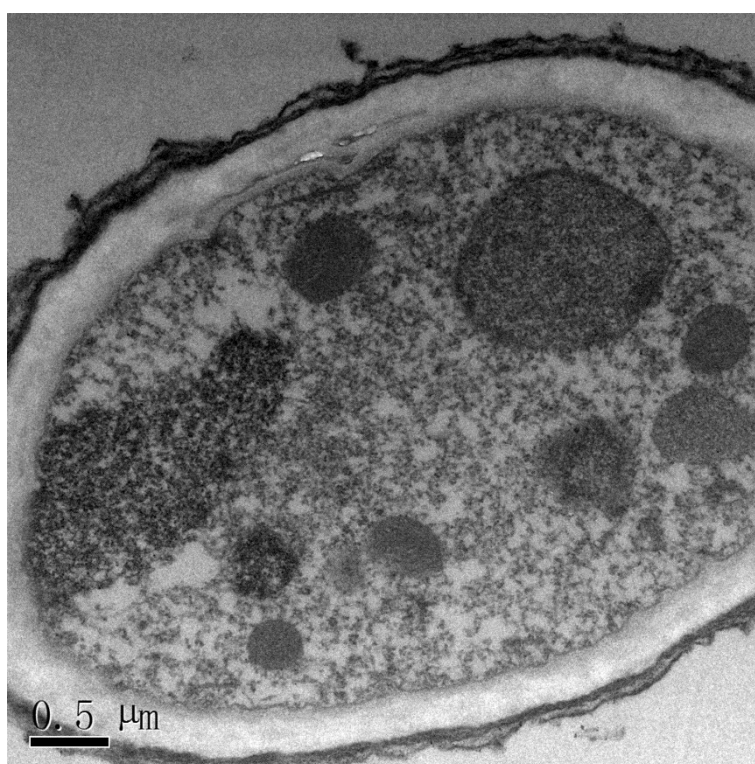

**Figure S4.** TEM micrograph of AgNPs-treated filamentous fungi

**Table S1.** Inhibition of AgNPs on the growth of *A. flavus*

| AgNPs ( $\mu\text{g} / \text{mL}$ ) | Inhibition rate (%) |
|-------------------------------------|---------------------|
| 5                                   | 0                   |
| 15                                  | 30                  |
| 25                                  | 57.8                |
| 35                                  | 85                  |
| 45                                  | 98                  |
| 60                                  | 100                 |

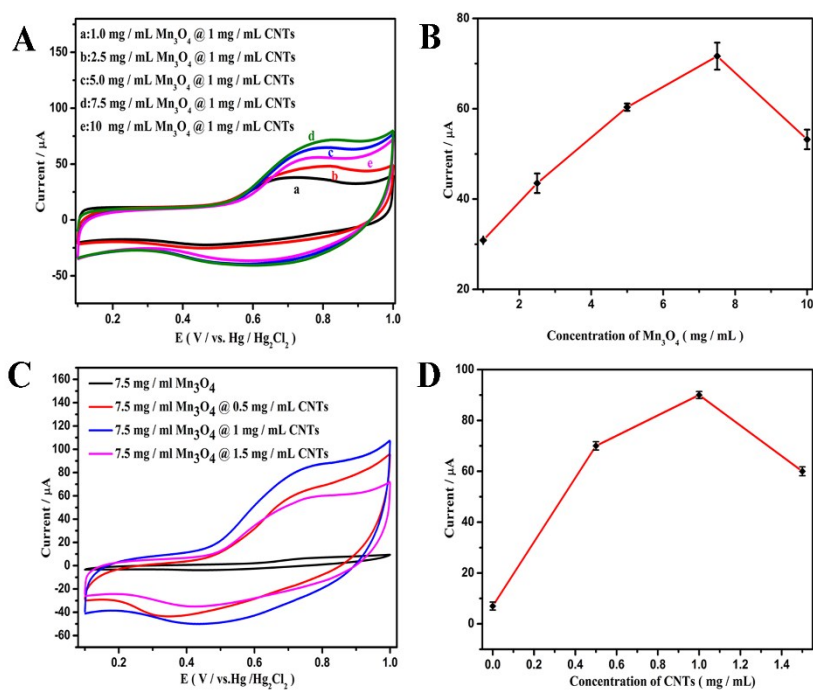

Figure S5. (A) and (B): Optimization diagram of the amount of  $\text{Mn}_3\text{O}_4$  nanorods; (C) and (D) Optimization diagram of the amount of MWCNTs.

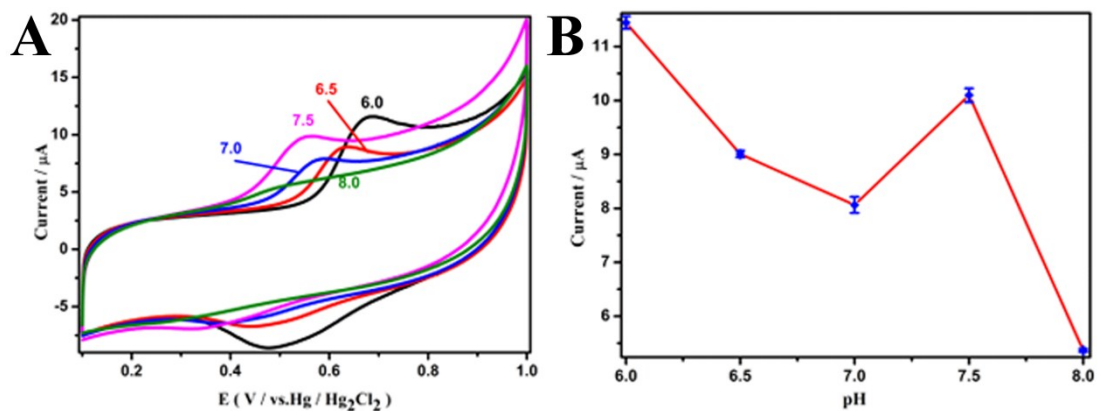

Figure S6. (A) and (B): pH optimization diagram of the MWCNTs- $\text{Mn}_3\text{O}_4$  nanorods-modified electrode.

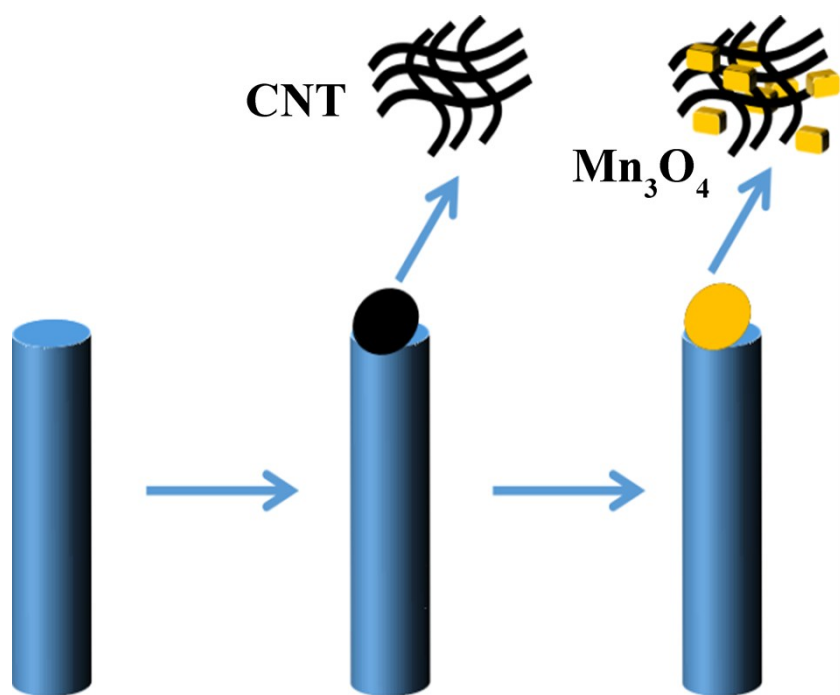

Figure S7. Manufacturing process of the MWCNTs-Mn<sub>3</sub>O<sub>4</sub> nanorods-modified electrode.
